# Supplementary material for: Aminoanthraquinone-based chemosensors: colorimetric molecular logic mimicking molecular trafficking and a set–reset memorized device
Source: Royal Society of Chemistry journal article supplement (doi:10.1039/c2dt12201d), 2012-01-01
Supplement: c2dt12201d.pdf [file c2dt12201d.pdf]

# Aminoanthraquinone based chemosensors: Colorimetric molecular logics mimicking molecular trafficking and set-reset memorized device

Navneet Kaur,<sup>\*a</sup> and Subodh Kumar<sup>b</sup>

<sup>a</sup> Department of Chemistry, Panjab University, Chandigarh, 160 014, Punjab, India; E-mail: [neet\\_chem@yahoo.co.in](mailto:neet_chem@yahoo.co.in)

<sup>b</sup> Department of Chemistry, Guru Nanak Dev University, Amritsar, 143 005, Punjab, India; E-mail: [subodh\\_gndu@yahoo.co.in](mailto:subodh_gndu@yahoo.co.in)

| Figure No. | Figure Caption                                                                                                                                                                             | Page No. |
|------------|--------------------------------------------------------------------------------------------------------------------------------------------------------------------------------------------|----------|
| Figure S1  | Changes in the absorption spectrum of <b>3</b> on gradual addition of (a) Cu <sup>2+</sup> ; (b) Ni <sup>2+</sup>                                                                          | S2       |
| Figure S2  | Changes in the absorption spectrum of <b>5</b> on gradual addition of Cu <sup>2+</sup>                                                                                                     | S3       |
| Figure S3  | Absorbance changes in the UV-Vis spectra of <b>6</b> (25 μM; pH 7.0; CH <sub>3</sub> CN:H <sub>2</sub> O 4:1) on gradual addition of (a) Co <sup>2+</sup> ; (b) Ni <sup>2+</sup>           | S4       |
| Figure S4  | Absorbance changes in the UV-Vis spectra of <b>6</b> (25 μM; pH 7.0; THF:H <sub>2</sub> O 4:1) on gradual addition of (a) Cu <sup>2+</sup> ; (b) Ni <sup>2+</sup> and (c) Co <sup>2+</sup> | S5       |
| Figure S5  | Absorption curves for molecular scale implementation of “traffic on” with addition of input 3 (Ni <sup>2+</sup> ions).                                                                     | S6       |
| Figure S6  | Absorption curves for molecular scale implementation of “traffic off” with addition of input 2 (Cu <sup>2+</sup> ).                                                                        | S7       |
| Figure S7  | Absorption curves for molecular scale implementation of “traffic off” with addition of input 3 (Ni <sup>2+</sup> ) followed by addition of input 2 (Cu <sup>2+</sup> ).                    | S8       |
| Figure S8  | Absorption curves for molecular scale implementation of “traffic off” with addition of input 1 (pH).                                                                                       | S9       |
| Figure S9  | Absorption curves for molecular scale implementation of “Set-Reset” device.                                                                                                                | S10      |

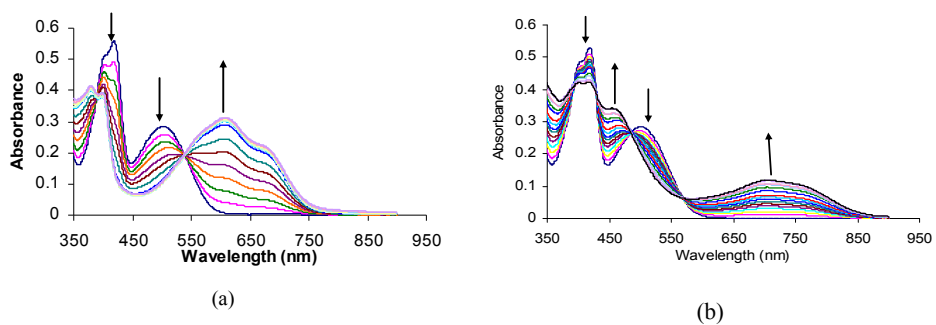

**Figure S1.** Changes in the absorption spectrum of **3** on gradual addition of (a)  $\text{Cu}^{2+}$ ; (b)  $\text{Ni}^{2+}$

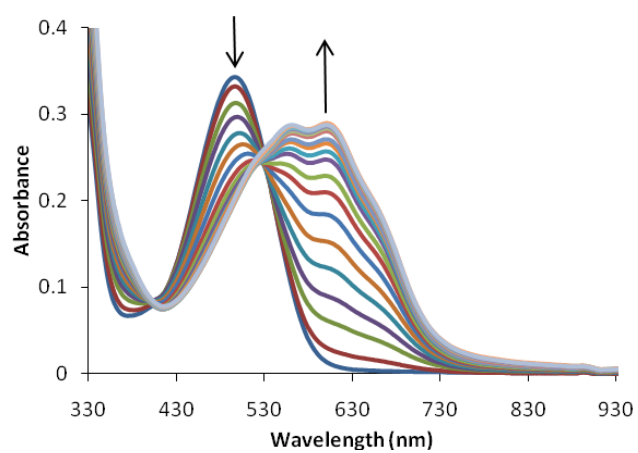

**Figure S2.** Changes in the absorption spectrum of **5** on gradual addition of Cu<sup>2+</sup>

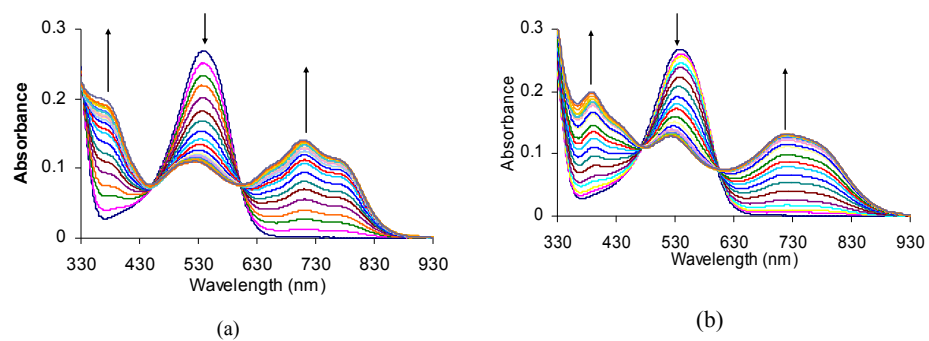

**Figure S3.** Absorbance changes in the UV-Vis spectra of **6** (25  $\mu\text{M}$ ; pH 7.0;  $\text{CH}_3\text{CN}:\text{H}_2\text{O}$  4:1) on gradual addition of (a)  $\text{Co}^{2+}$ ; (b)  $\text{Ni}^{2+}$

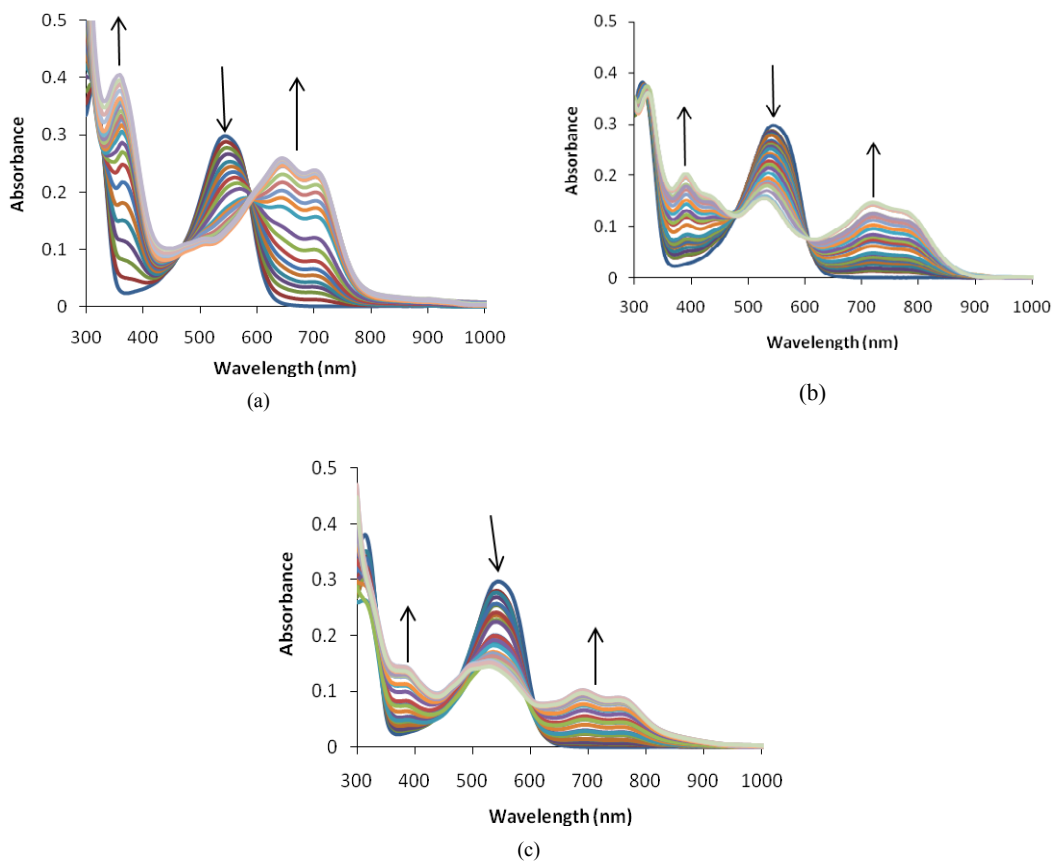

**Figure S4.** Absorbance changes in the UV-Vis spectra of **6** (25 μM; pH 7.0; THF:H<sub>2</sub>O 4:1) on gradual addition of (a) Cu<sup>2+</sup>; (b) Ni<sup>2+</sup> and (c) Co<sup>2+</sup>

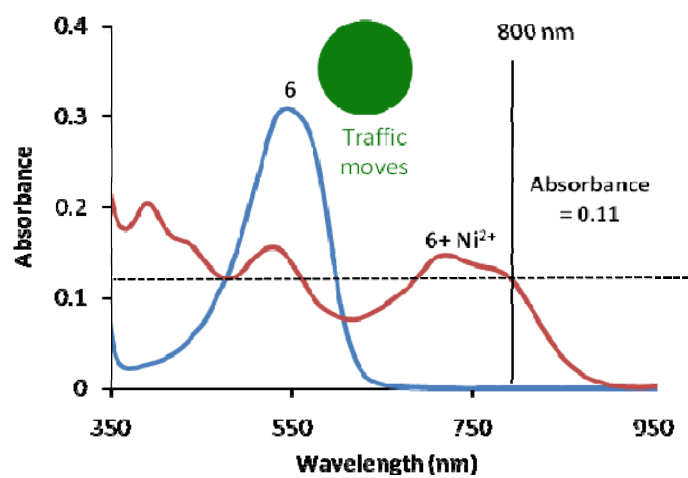

**Figure S5:** Absorption curves for molecular scale implementation of “traffic on” with addition of input 3 (Ni<sup>2+</sup> ions).

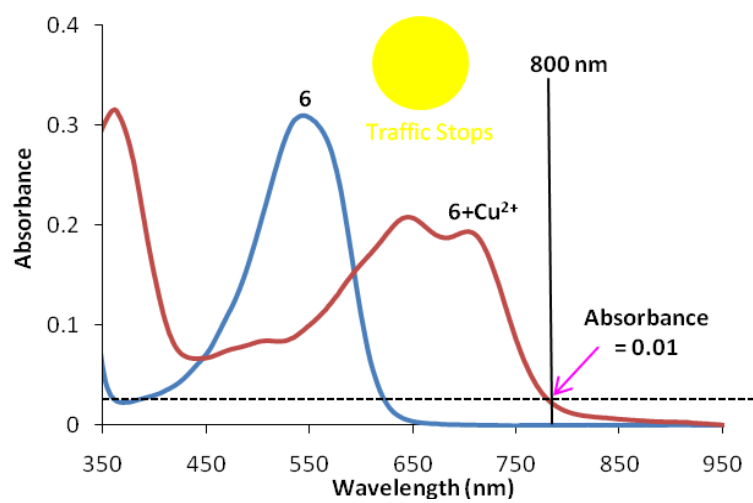

**Figure S6:** Absorption curves for molecular scale implementation of “traffic off” with addition of input 2 ( $\text{Cu}^{2+}$ ).

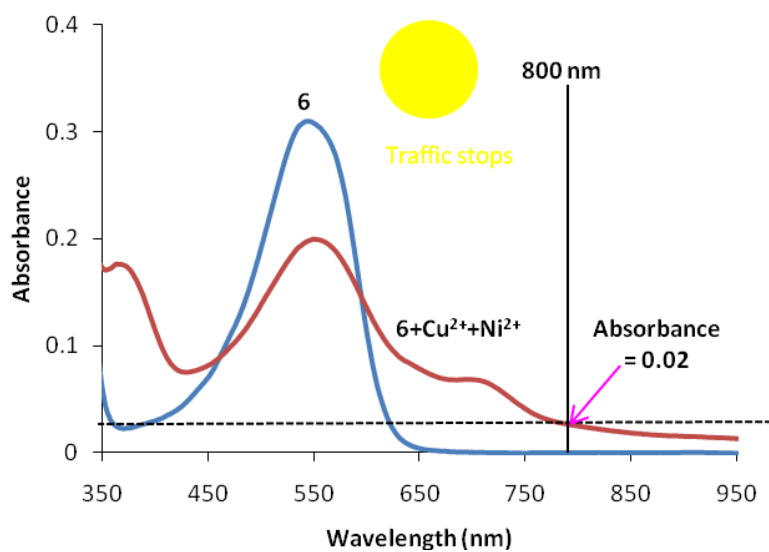

**Figure S7:** Absorption curves for molecular scale implementation of “traffic off” with addition of input 3 (Ni<sup>2+</sup>) followed by addition of input 2 (Cu<sup>2+</sup>).



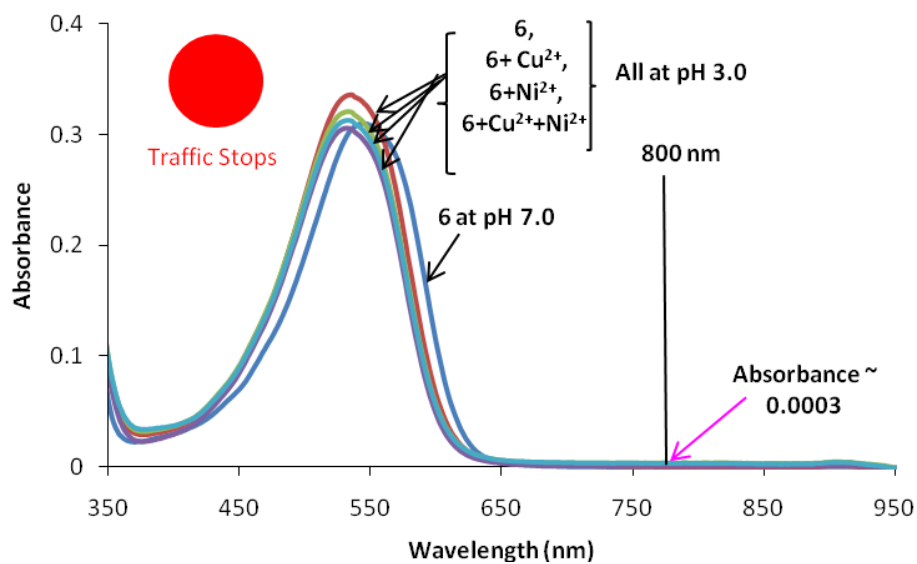

**Figure S8:** Absorption curves for molecular scale implementation of “traffic off” with addition of input 1 (pH).

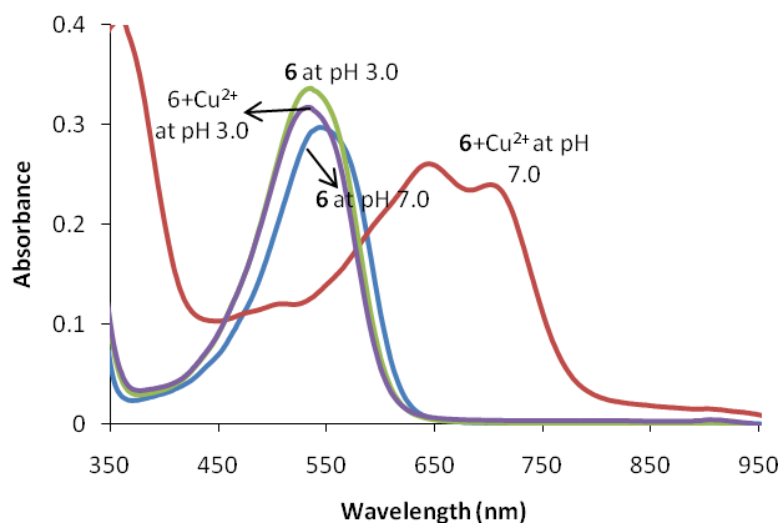

**Figure S9:** Absorption curves for molecular scale implementation of “Set-Reset” device.
